# Supplementary material
Source: Springer Nature journal article supplement (https://www.springermedizin.de/resource/supplementary/12886_2010_208_MOESM1_ESM.pdf/9473522)

Figure 1.

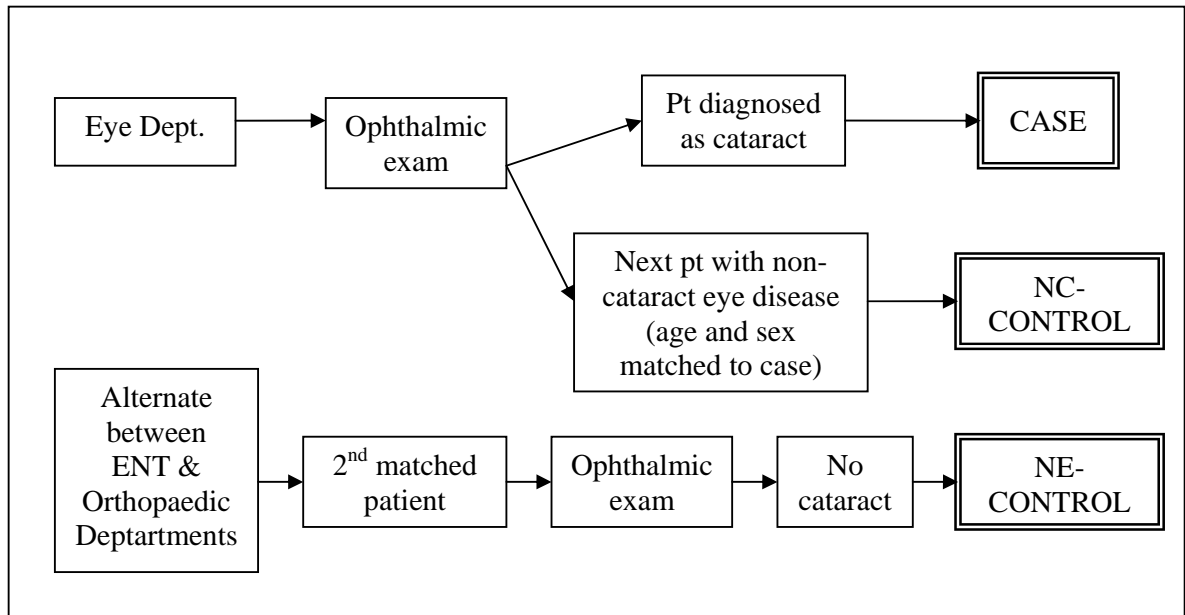

Supplement: MOESM1 [file 9473522]
